# Supplementary material for: Emergence of lake conditions that exceed natural temperature variability
Source: Springer Nature journal article supplement (doi:10.1038/s41561-024-01491-5), 2024-07-12
Supplement: 41561_2024_1491_MOESM1_ESM.pdf [file 41561_2024_1491_MOESM1_ESM.pdf]

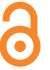

---

# Emergence of lake conditions that exceed natural temperature variability

---

In the format provided by the authors and unedited

1 **Supplementary Information**

2

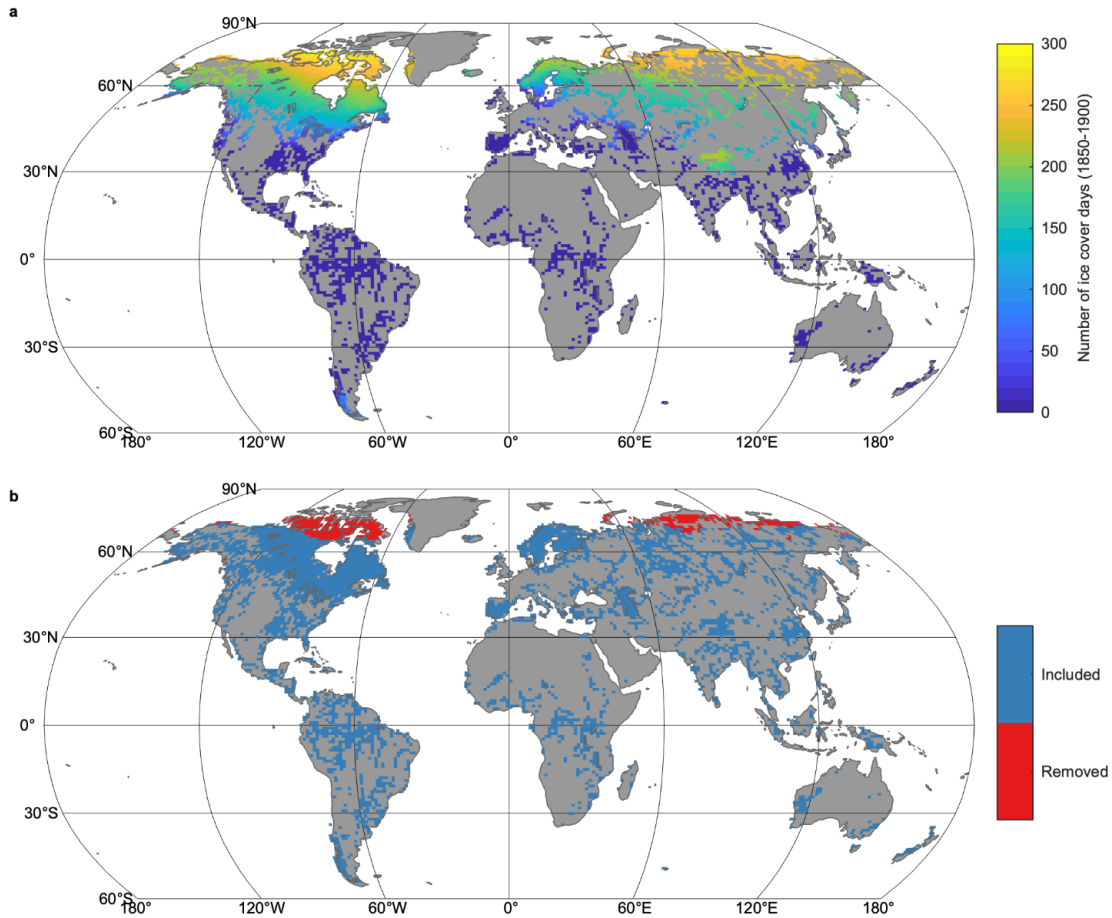

3

4

5 **Supplementary Figure 1 | Criteria for selecting the studied lakes from CESM2-LE.** In this  
6 study we excluded all modelled grids where the simulated lakes experienced at least 8 months of  
7 annual ice cover during the historical (1850-1900) period. Here, we show (a) the number of  
8 annual ice cover days for each lake during the 1850-1900 base-period, and (b) a binary map  
9 identifying the lakes included in the study, notably those with less than 8 months of annual ice  
10 cover. The number of ice cover days in each year was calculated from the average of the model  
11 ensembles.

12

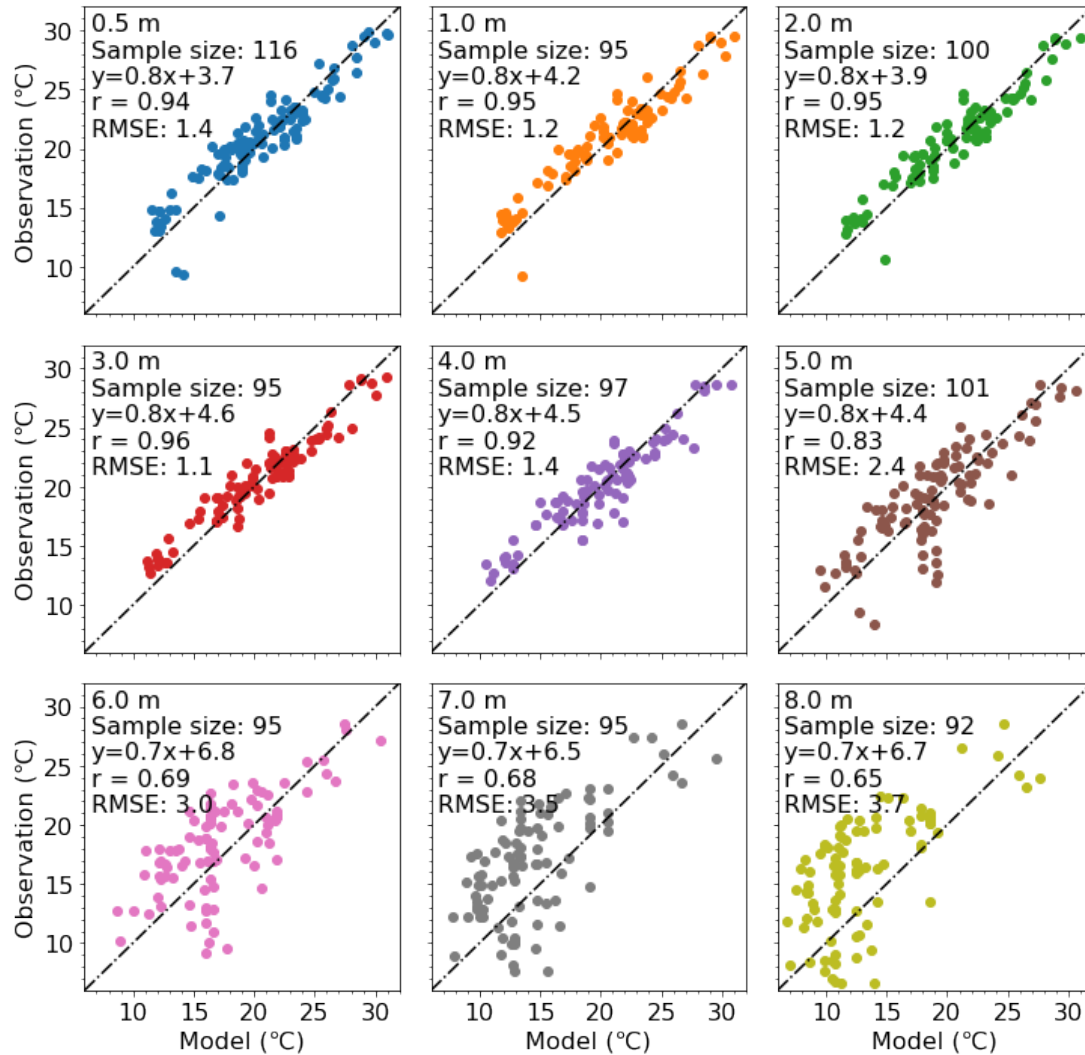

13  
 14 **Supplementary Figure 2 | Validation of depth-resolved lake water temperature simulations.**  
 15 Shown are the relationships between simulated and observed climatological mean water  
 16 temperatures during the warm-season in lakes with available data. Please refer to Supplementary  
 17 Table 1 for more information about the lakes. Each lake has observations spanning at least 10  
 18 years. For each lake, we validate the model only against the observed data for matching years.  
 19 Note that all the observations taken at a depth <0.5 m were assigned to 0.5 m. Observations taken  
 20 from a depth range of 0.5 m to 1.5 m were assigned to 1 m in the model comparison, and a similar  
 21 treatment was applied to the other depths shown.  
 22

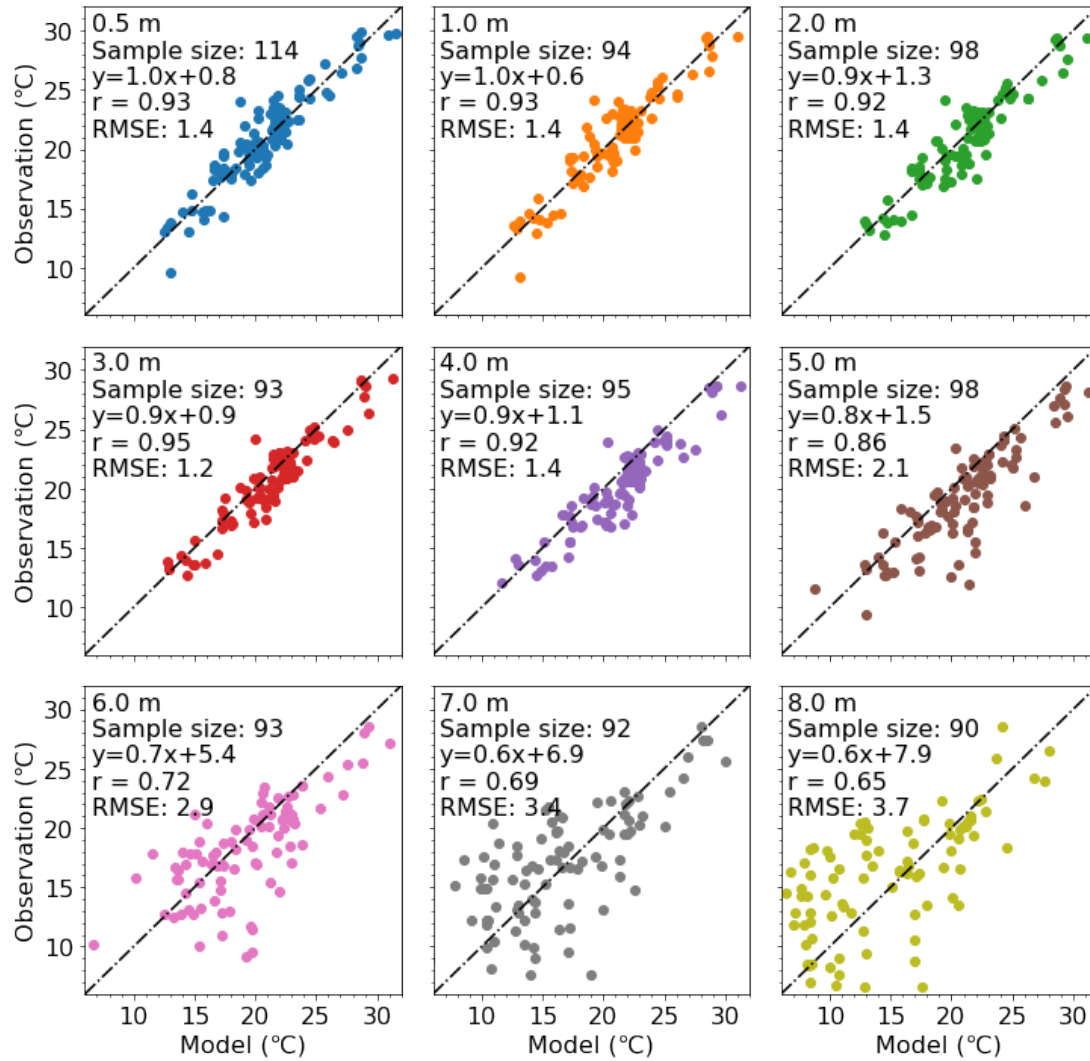

23  
 24 **Supplementary Figure 3 | Validation of depth-resolved lake water temperature simulations**  
 25 **from SimStrat-UoG.** Similar to Supplementary Figure 2 but comparing observed temperatures  
 26 with model simulations from the Simstrat-UoG model (see Methods).

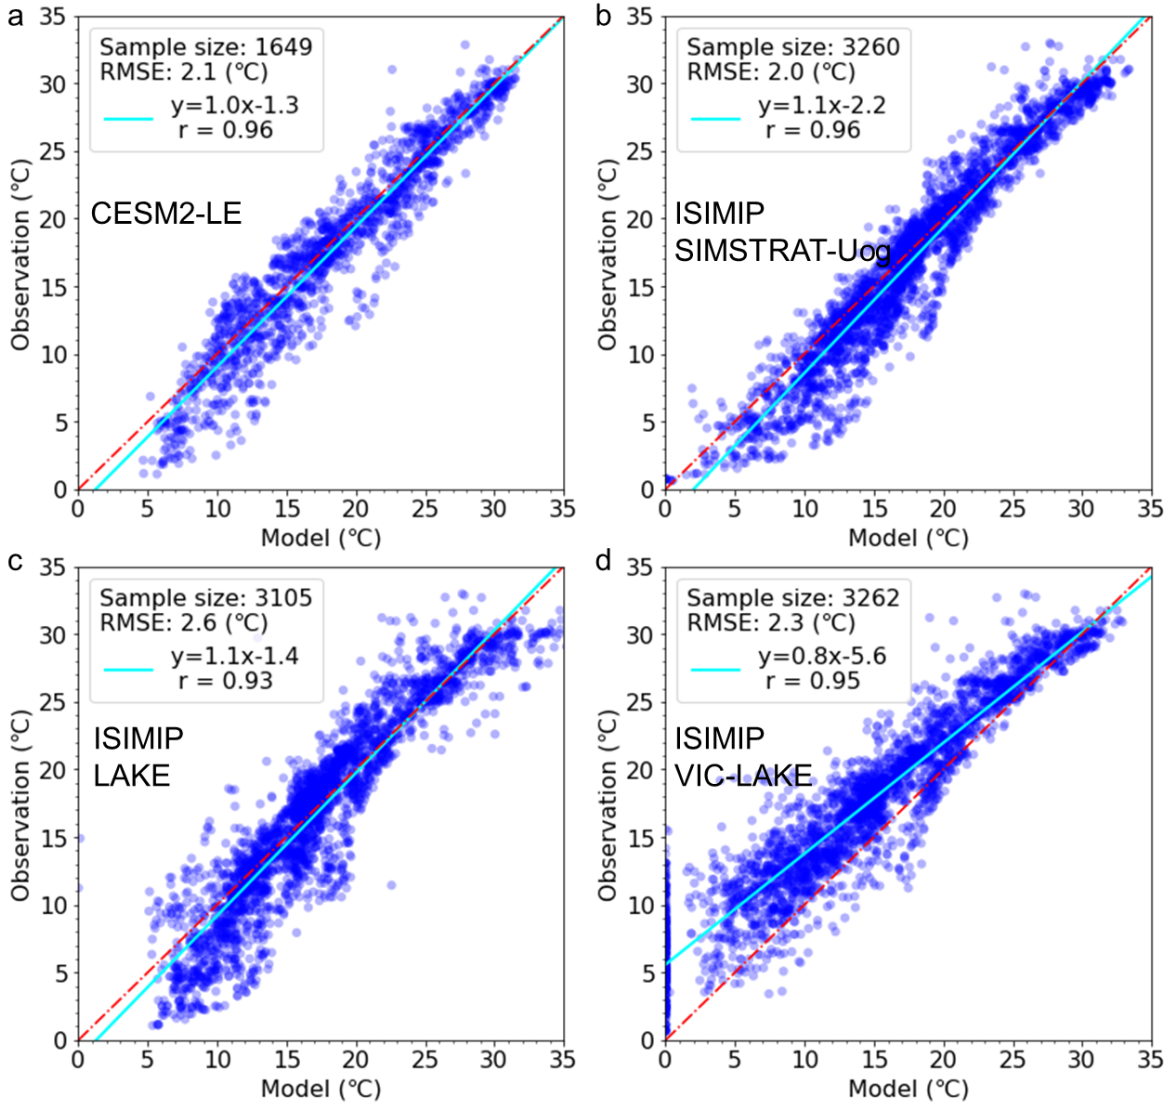

27  
 28 **Supplementary Figure 4 | Validation of simulated surface water temperatures against**  
 29 **satellite observations.** Shown in panel **a** is a comparison of satellite-derived warm-season lake  
 30 surface water temperatures and those simulated by CESM2-LE. The simulated temperatures  
 31 shown are based on the mean of the 100-member ensemble. Monthly satellite-derived water  
 32 temperatures were extracted from the ARC-Lake v3.0 data product. Panels **b-d** show similar  
 33 comparisons to panel **a** but for three lake model simulations available from ISIMIP2b at a 0.5° by  
 34 0.5° longitude-latitude resolution (compared to 1° for CESM2-LE): **(b)** SimStrat-UoG, **(c)** LAKE,  
 35 and **(d)** VIC-LAKE. In each panel we show the sample size, the calculated Root Mean Square  
 36 Error (RMSE), and the linear fit between the simulations and observations.

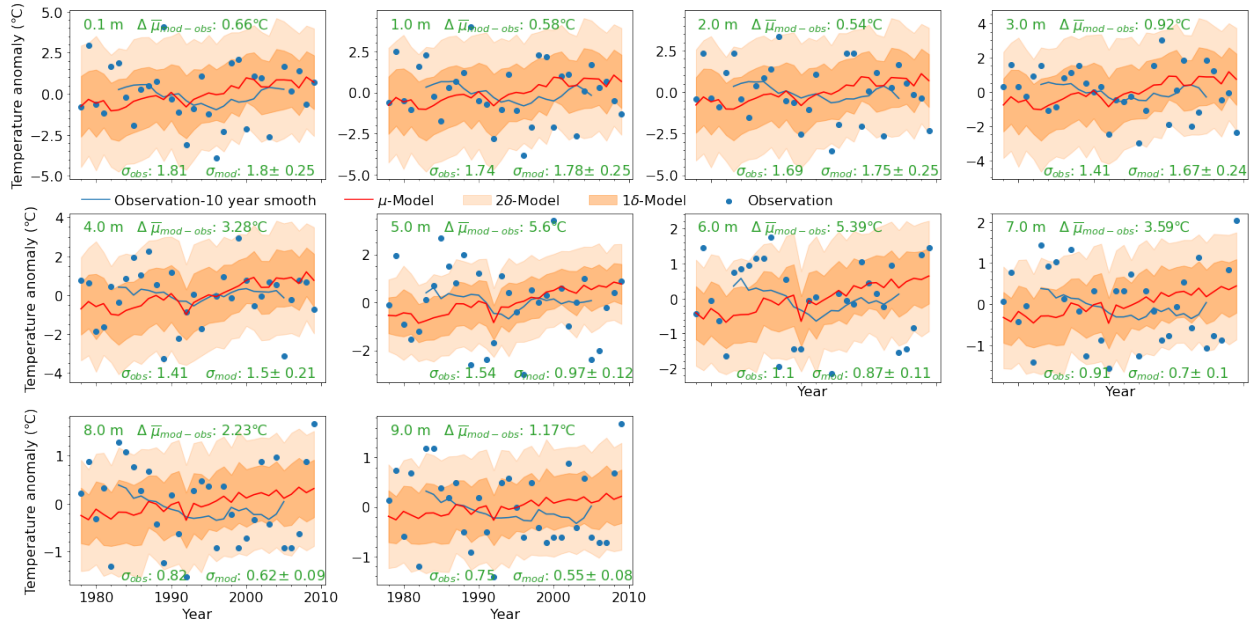

37  
 38 **Supplementary Figure 5 | Simulated and observed temperatures from Lake Dickie (Canada).**  
 39 Shown is a comparison of the simulated and observed warm-season water temperature anomalies  
 40 for Lake Dickie (45.2 °N, -79.1 °E). The blue line with circles demonstrates the in-situ  
 41 observations. The red line demonstrates the simulated ensemble mean, and the dark and light  
 42 orange shadings demonstrate one and two standard deviations of all ensemble members around the  
 43 mean, respectively. The temperature anomaly is calculated against the climatological mean. The  
 44 depth of water temperature shown in each panel are given on the top left.  $\Delta \bar{\mu}$  denotes the difference  
 45 of climatological mean between the simulations and observations.  $\delta_{obs}$  and  $\delta_{mod}$  denotes the  
 46 standard deviation of the observations and simulations, respectively.

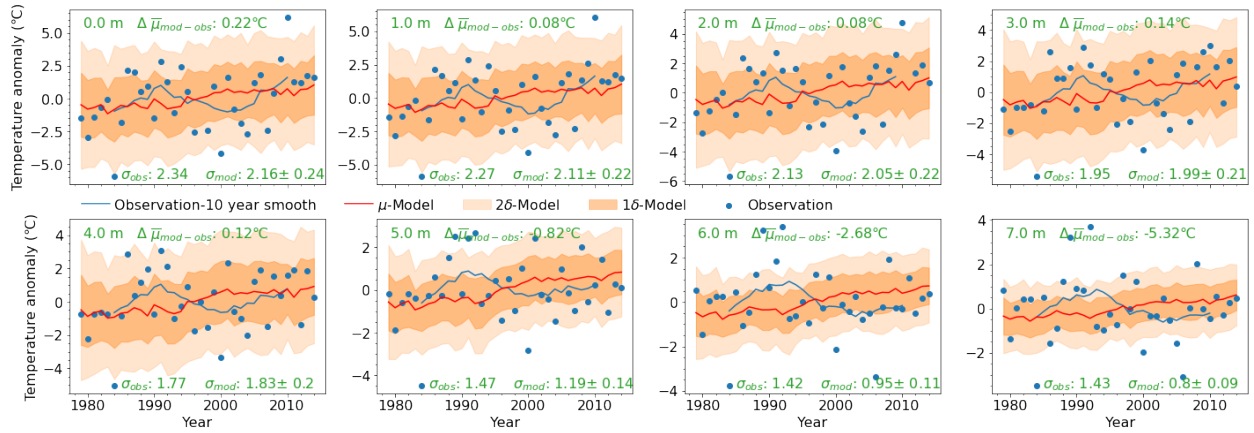

47  
 48 **Supplementary Figure 6 | Simulated and observed depth-resolved temperatures from**  
 49 **Müggelsee (Germany).** Shown is a comparison of the simulated and observed warm-season water  
 50 temperature anomalies for Müggelsee (52.4 °N, 13.7 °E). The blue line with circles demonstrates  
 51 the in-situ observations. The red line demonstrates the simulated ensemble mean, and the dark and  
 52 light orange shadings demonstrate one and two standard deviations of all ensemble members  
 53 around the mean. The data treatment and legends are the same as Supplementary Figure 5.  
 54

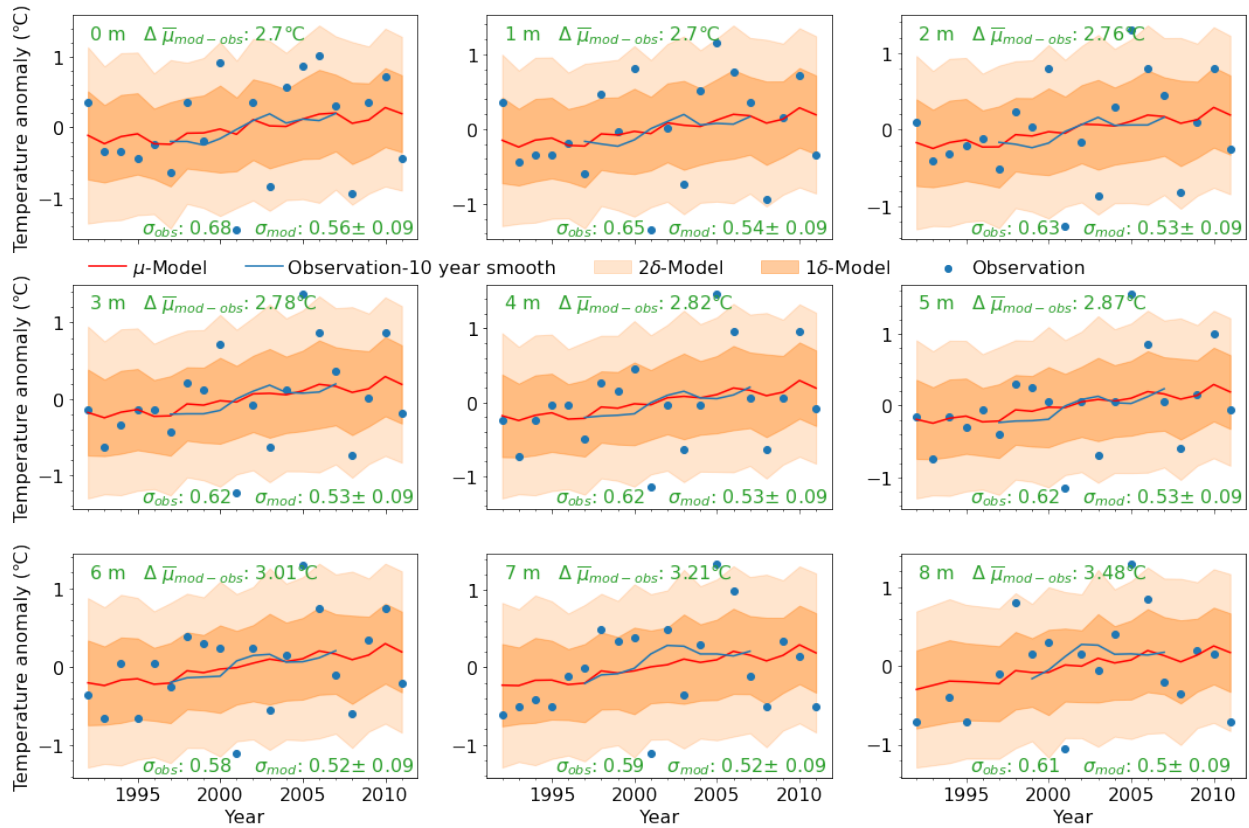

55  
56  
57  
58  
59  
60  
61  
62

**Supplementary Figure 7 | Simulated and observed depth-resolved temperatures from Lake Nkuruba (Uganda).** Shown is a comparison of the simulated and observed warm-season water temperature anomalies in Lake Nkuruba (0.52 °N, 30.3 °E). The blue line with circles demonstrates the in-situ observations. The red line demonstrates the simulated ensemble mean, and the dark and light orange shadings demonstrate one and two standard deviations of all ensemble members around the mean. The data treatment and legends are the same as Supplementary Figure 6.



63

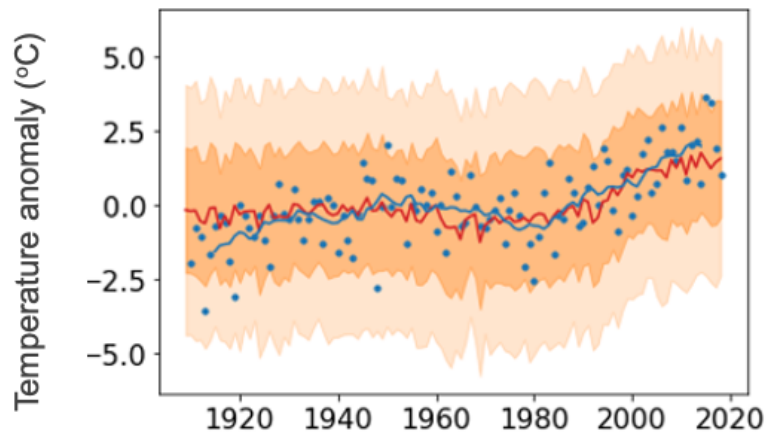

64

65

66 **Supplementary Figure 8 | Simulated and observed temperatures from Würthersee (Austria).**

67 Shown is a comparison of the simulated and observed water temperature anomalies for Würthersee

68 (46.6 °N, 14.2 °E). The blue line with circles demonstrates the in-situ observations. The red line

69 demonstrates the simulated ensemble mean, and the dark and light orange shadings demonstrate

70 one and two standard deviations of all ensemble members around the mean, respectively. The

71 temperature anomaly is calculated against the climatological mean.

72

73  
74

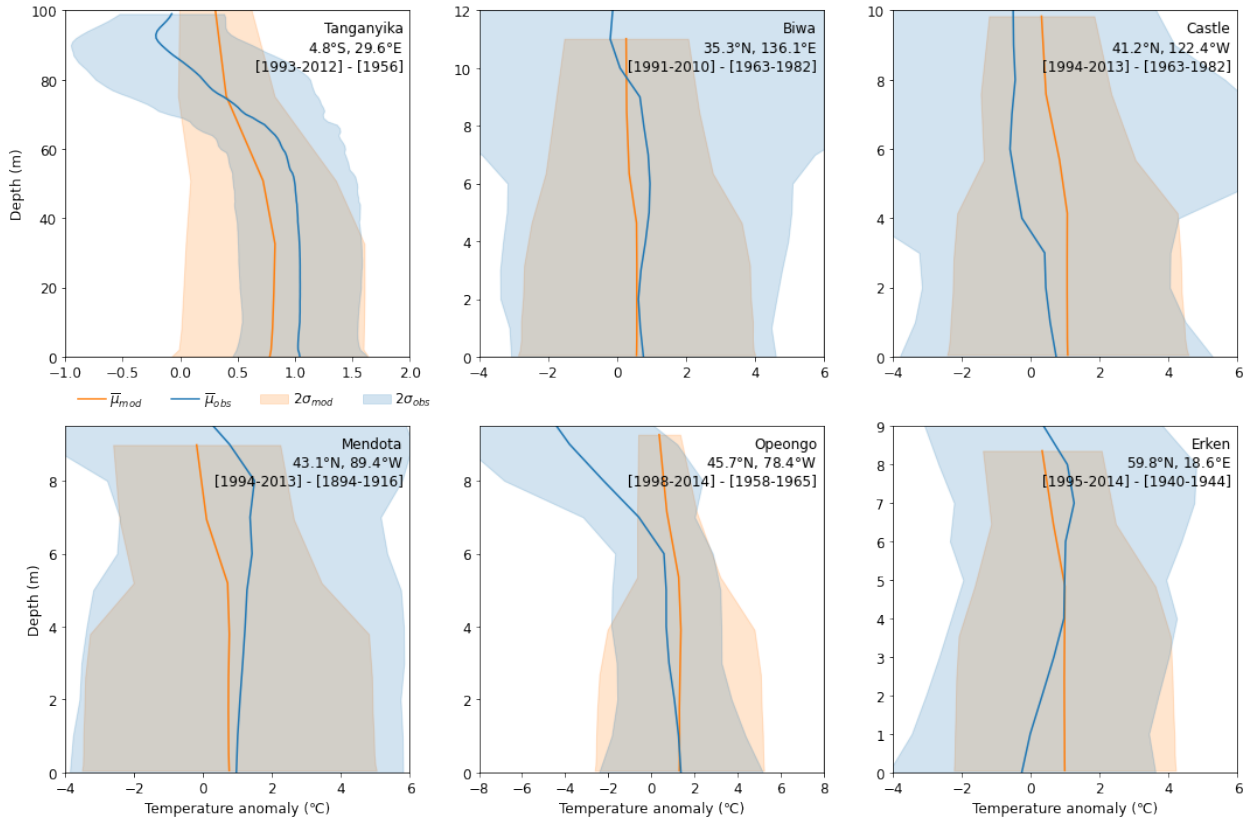

75  
76  
77  
78  
79  
80  
81  
82  
83  
84  
85

**Supplementary Figure 9 | Simulated and observed depth-resolved water temperatures.**

Shown is a comparison of the simulated and observed water temperature anomalies (from bottom to top) in six lakes situated across climatic gradients. Temperature anomalies are shown for the most recent 20 years and are calculated relative to the periods illustrated in the legends. Note observational records have hiatus and thus some years are missing. Solid lines represent the mean of the most recent 20 years, and the shaded regions represent 2 times the standard deviation, shown for both the model and observations.

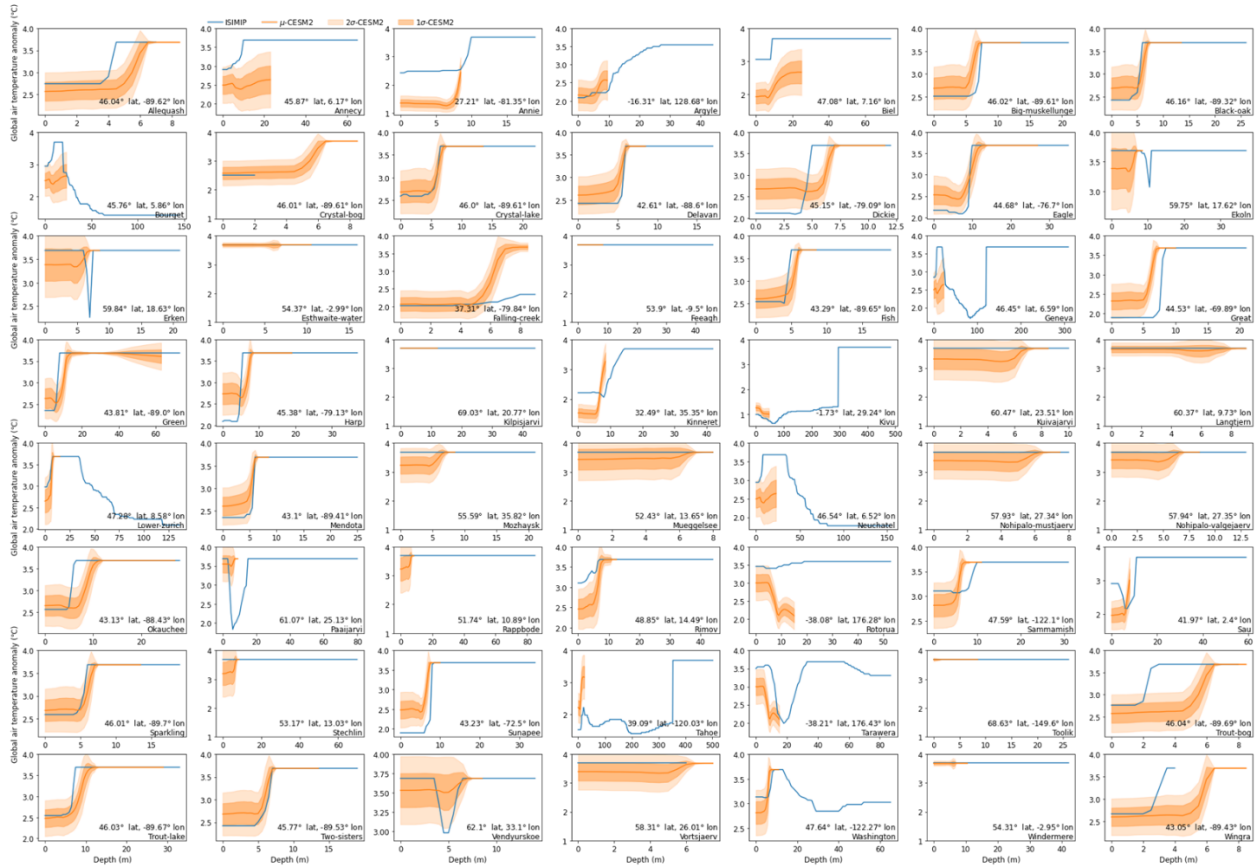

86  
 87 **Supplementary Figure 10 | Vertical profile of emergence of no-analogue conditions in 56**  
 88 **lakes projected by the ISIMIP and CEM2-LE.** The Y-axis represents the magnitude of  
 89 projected global warming corresponding to the year of no-analogue conditions emerging. The  
 90 orange solid line demonstrates the mean of ensemble members in CEM2-LE, and the dark and  
 91 light orange shadings demonstrate one and two standard deviations of all ensemble members  
 92 around the mean. The highest magnitude of global warming in ISIMIP is 3.7 °C. Any calculations  
 93 that no-analogue conditions will not emerge under the warming magnitude of 3.7 °C are assigned  
 94 with the value of 3.7 °C.  
 95

96

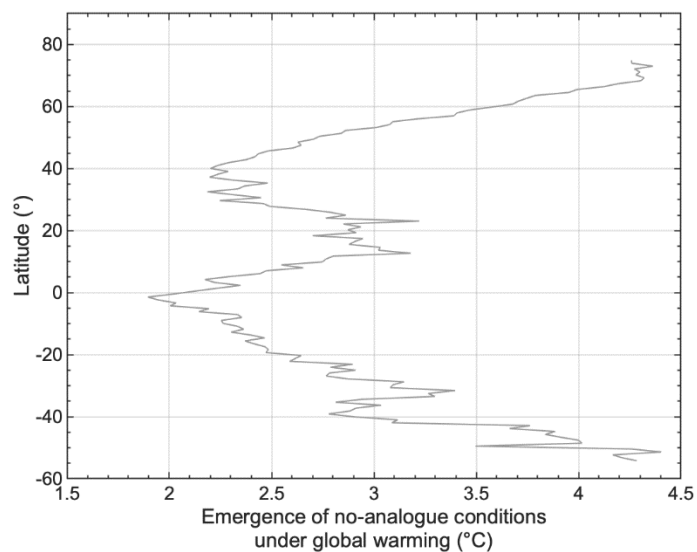

97

98

99 **Supplementary Figure 11 | Latitudinal distribution in the emergence of no-analogue**

100 **conditions at the lake surface.** Shown is the projected emergence of no-analogue conditions at

101 the lake surface under global warming, averaged across latitudes. The values shown illustrate the

102 global warming levels projected to result in no-analogue conditions across the studies lakes.

103

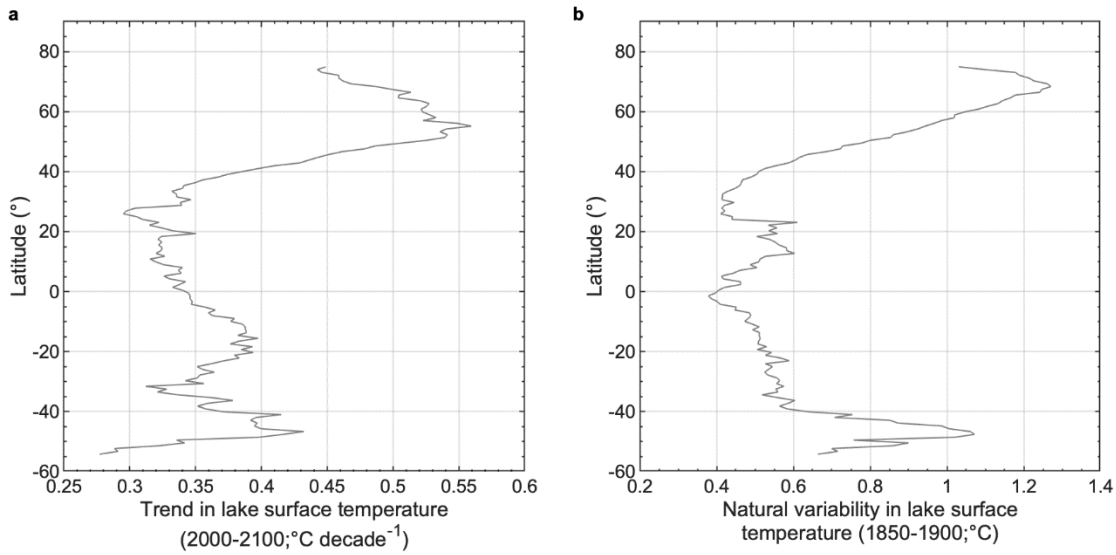

104

105

106 **Supplementary Figure 12 | Latitudinal distribution in the trend and natural variability of**  
107 **surface water temperature.** Shown are (a) the projected rate of change (2000-2100), and (b) the  
108 natural variability (1850-1900) in surface water temperature, averaged across latitudes. The trend  
109 in surface water temperature is calculated from the average of the 100-member ensemble, using a  
110 linear regression model.

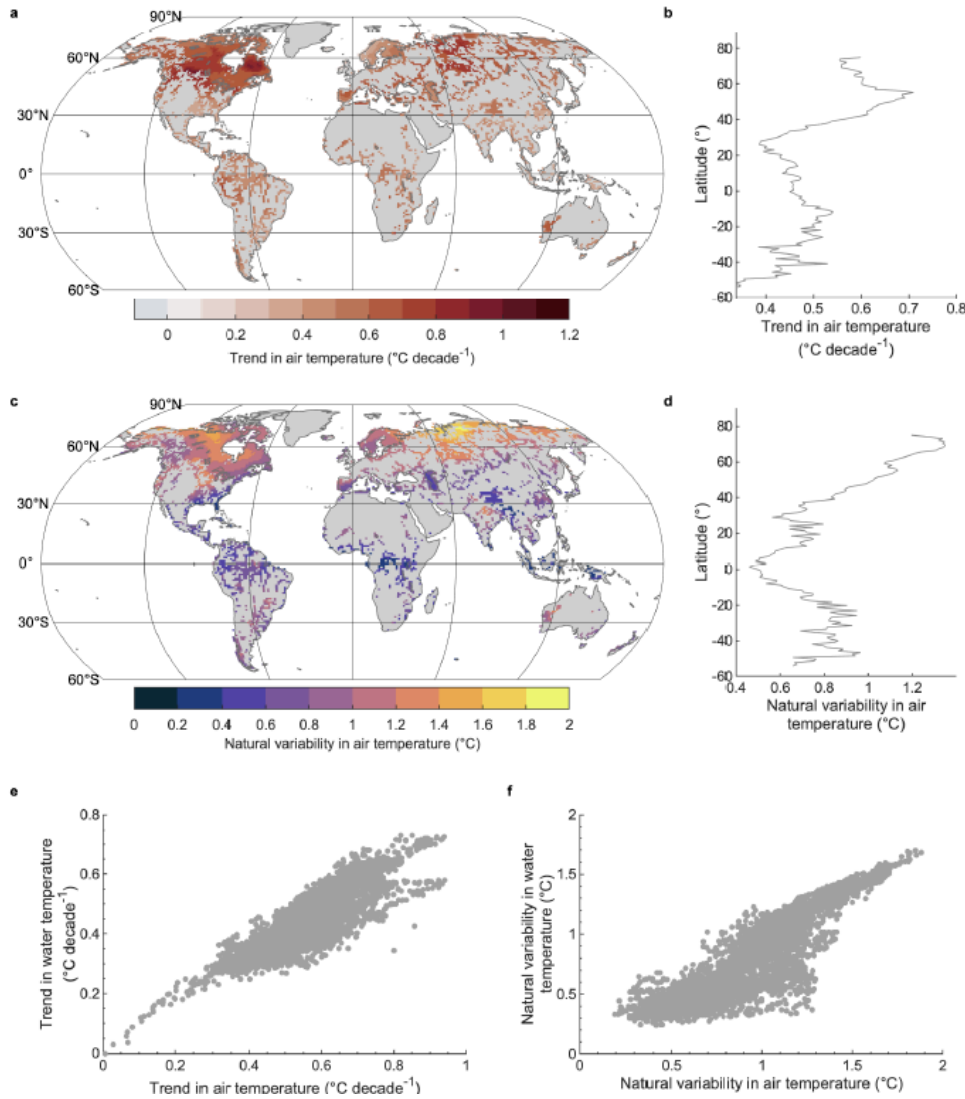

112

113

114 **Supplementary Figure 13 | Across-lake differences in the trend and natural variability in air**  
115 **temperature.** Shown are (a-b) the rate of change (2000-2100) and (c-d) the natural variability (1850-1900) in air temperature across the studied lake locations (i.e., selecting only the grids where  
116 lakes were present), and (b, d) averaged across latitudes. The trend in air temperature is calculated  
117 from the average of the 100-member ensemble, using a linear regression model. Also shown are  
118 the relationships between the (e) trend and (f) natural variability in air temperature and those  
119 projected for lake surface water temperature.  
120

121

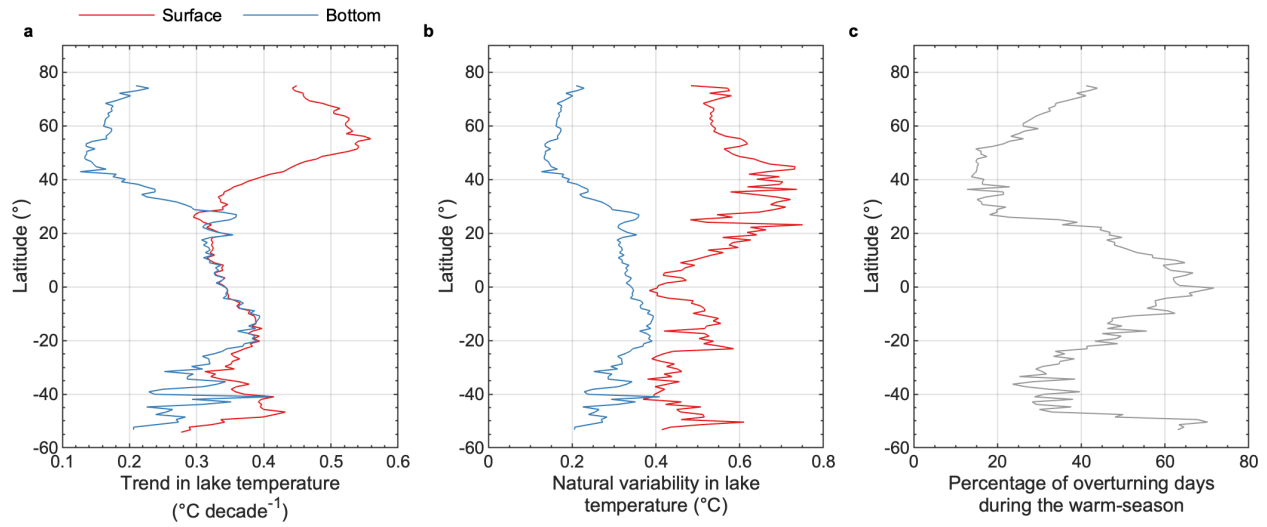

122

123

124 **Supplementary Figure 14 | Latitudinal distribution in the trend and natural variability of**

125 **surface and bottom water temperature.** Shown are the latitudinal distributions in (a) the

126 projected trends (2000-2100) and (b) the natural variability (1850-1900) in surface (red) and

127 bottom (blue) water temperature in lakes. Also shown is (c) the latitudinal variation in the

128 percentage of overturning days during the warm-season (1850-1900). The trend and natural

129 variability in lake surface and bottom water temperature are similar when the percentage of

130 overturning days is high.

131 **Supplementary Table 1 | Overview of lakes with observational data investigated in this study.**  
 132 Shown are the names of each lake, their latitude, longitude, elevation (m), surface area (km<sup>2</sup>),  
 133 maximum depth (m), and mean depth (m). Latitude and longitude are shown here to two decimal  
 134 places.  
 135

| Lake ID | Lake Name               | Latitude | Longitude | Elevation (m) | Surface Area (km <sup>2</sup> ) | Max Depth (m) | Mean Depth (m) |
|---------|-------------------------|----------|-----------|---------------|---------------------------------|---------------|----------------|
| 1       | Acton                   | 39.56    | -84.47    | 286           | 2.5                             | 8             | 4              |
| 2       | Aleknagik               | 59.34    | -158.78   | 10            | 83                              | 110           | 43             |
| 3       | Allequash               | 46.04    | -89.62    | 494           | 1.68                            | 8             | 2.9            |
| 4       | Allgjuttern             | 57.90    | 18.46     | 126.3         | 0.19                            | 40.7          | 11.4           |
| 6       | Annie                   | 27.21    | -81.35    | 33.7          | 0.37                            | 20.7          | 8.26           |
| 8       | Baikal                  | 51.88    | 105.08    | 456.4         | 32500                           | 1750          | 720            |
| 9       | Bassenthwaite Lake      | 54.39    | -3.13     | 69            | 5.3                             | 19            | 5.3            |
| 10      | Batorino                | 54.85    | 26.97     | 163           | 6.3                             | 5.5           | 3              |
| 11      | Beverley                | 59.67    | -158.78   | 30            | 90                              | 188           | 55             |
| 12      | Big Muskellunge         | 46.02    | -89.61    | 500           | 3.96                            | 21.3          | 7.5            |
| 14      | Biwa                    | 35.31    | 136.12    | 84.37         | 670.25                          | 103.58        | 41.2           |
| 15      | Blelham Tarn            | 54.24    | -2.59     | 47            | 0.1                             | 14.5          | 6.8            |
| 16      | Blue Chalk              | 45.20    | -78.94    | 343.5         | 0.5235                          | 23            | 8.5            |
| 18      | Brunner                 | -42.62   | 171.45    | 186           | 41                              | 109           | 55.00          |
| 19      | Brunnsjön               | 57.48    | 13.62     | 94.4          | 0.11                            | 10.6          | 5.3            |
| 20      | Bubble Pond             | 44.34    | -68.24    | 101           | 0.13                            | 11.9          | 6.4            |
| 21      | Burley-Griffin          | -35.30   | 149.07    | 556           | 6.64                            | 17            | 5              |
| 22      | Byglandsfjorden         | 58.78    | 7.82      | 203           | 33                              | 167           |                |
| 23      | Castle                  | 41.23    | -122.38   | 1646          | 0.2                             | 35            | 11.4           |
| 24      | Champlain: Mallet's Bay | 44.58    | 73.28     | 29.1          | 54.1                            | 32            | 13.35          |
| 25      | Chignik                 | 56.26    | -158.83   | 5             | 22                              | 64            | 26             |
| 27      | Clearwater              | 46.37    | -81.05    | 267           | 0.76                            | 21.5          | 8.4            |
| 28      | Constance               | 47.62    | 9.38      | 395           | 473                             | 251           | 101            |
| 30      | Crosson                 | 45.08    | -79.04    | 332           | 0.5674                          | 25            | 9.2            |
| 32      | Crystal Lake            | 46.00    | -89.61    | 502           | 0.37                            | 20.4          | 10.4           |
| 33      | Derwent Water           | 54.58    | -3.14     | 75            | 5.4                             | 22            | 5.5            |
| 34      | Dickie                  | 45.15    | -79.09    | 354.5         | 0.936                           | 12            | 5              |
| 35      | Douglas                 | 45.57    | -84.67    | 217           | 13.74                           | 24.38         | 4.96           |



|    |                            |        |         |        |         |       |       |
|----|----------------------------|--------|---------|--------|---------|-------|-------|
| 36 | Eagle                      | 44.36  | -68.25  | 84     | 1.77    | 33.6  | 13.4  |
| 38 | Erken                      | 59.84  | 18.63   | 11.1   | 24.2    | 20.65 | 9     |
| 39 | Esthwaite Water            | 54.37  | -2.99   | 65     | 1       | 15.5  | 6.9   |
| 40 | Eucha                      | 36.38  | -94.93  | 237    | 11.38   | 28.3  |       |
| 41 | Fiolen                     | 57.06  | 16.57   | 226    | 1.64    | 10.5  | 3.8   |
| 42 | Fish                       | 43.29  | -89.65  |        | 0.87    | 18.9  | 6.6   |
| 43 | Flathead                   | 47.90  | -114.10 | 882    | 495.9   | 105   | 39    |
| 44 | Fräcksjön                  | 58.15  | 13.85   | 58     | 0.28    | 14.5  | 6     |
| 45 | Garda                      | 45.70  | 10.72   | 65     | 368     | 350   | 133   |
| 47 | Giles                      | 41.38  | -75.09  | 428    | 0.48    | 24    | 10.1  |
| 49 | Grasmere                   | 54.27  | -3.01   | 62     | 0.6     | 21.5  | 7.7   |
| 50 | Harp                       | 45.38  | -79.14  | 327    | 0.7138  | 37.5  | 13.32 |
| 53 | Heney                      | 45.13  | -79.10  | 345.5  | 0.2137  | 5.8   | 3.3   |
| 56 | Hornindalsvatnet           | 61.95  | 6.39    | 53     | 51      | 514   |       |
| 58 | IISD Experimental Lake 224 | 49.69  | -93.72  |        | 0.26    | 27.4  | 11.6  |
| 59 | IISD Experimental Lake 239 | 49.66  | -93.72  | 393    | 0.56    | 30.4  | 10.5  |
| 60 | IISD Experimental Lake 240 | 49.65  | -93.73  |        | 0.44    | 13.1  | 6.1   |
| 61 | IISD Experimental Lake 373 | 49.74  | -93.80  |        | 0.27    | 20.8  | 11    |
| 62 | IISD Experimental Lake 442 | 49.78  | -93.82  |        | 0.16    | 17.8  | 9     |
| 63 | Inarijärvi                 | 69.08  | 27.92   | 118.7  | 1081.92 | 92    | 14.3  |
| 64 | Iseo                       | 45.72  | 10.07   | 186    | 62      | 251   | 123   |
| 65 | Jordan Pond                | 44.33  | -68.26  | 84     | 0.76    | 45.7  | 25.6  |
| 66 | Kallavesi                  | 62.76  | 27.78   | 81.8   | 480.31  | 75    | 9.6   |
| 67 | Katepwa                    | 50.69  | -103.96 | 478.2  | 22.6    | 22    | 14.3  |
| 68 | Kinneret                   | 32.83  | 35.59   | -210   | 166.7   | 46.1  | 25.6  |
| 69 | Kivu                       | -2.28  | 28.98   | 1463   | 2370    | 240   | 485   |
| 70 | Konnevesi                  | 62.63  | 26.60   | 95.4   | 190.28  | 57.1  | 10.6  |
| 71 | Konnevesi                  | 62.63  | 26.60   | 95.4   | 190.28  | 57.1  | 10.6  |
| 72 | Kulik                      | 59.80  | -158.89 | 43     | 45      | 160   | 77    |
| 73 | Kurilskoye Lake            | 51.42  | 157.08  | 104    | 77.05   | 316   | 195   |
| 76 | Lillinonah                 | 41.48  | -73.35  | 59     | 6.26    | 33    | 13    |
| 77 | Little Togiak              | 59.58  | -159.16 | 23     | 6       | 77    | 30    |
| 78 | Lower Lake Zurich          | 47.30  | 8.60    | 406    | 67      | 136   | 49    |
| 79 | Lugano.North               | 46.01  | 9.02    | 271    | 27.5    | 288   | 171   |
| 80 | Lugano.South               | 45.96  | 8.89    | 271    | 20.3    | 95    | 55    |
| 82 | Maggiore                   | 45.94  | 8.63    | 193.88 | 212.5   | 370   | 176.5 |
| 83 | Mascardi                   | -41.33 | -71.51  | 807    | 39.2    | 218   | 111   |
| 84 | Mendota                    | 43.10  | -89.41  |        | 39.38   | 25.3  | 12.8  |
| 85 | Mjøsa                      | 60.69  | 11.06   | 123    | 362     | 453   |       |

|     |                 |        |         |       |         |      |      |
|-----|-----------------|--------|---------|-------|---------|------|------|
| 86  | Mohonk          | 41.77  | -74.16  | 379   | 0.07    | 18.5 | 6    |
| 87  | Mondsee         | 47.82  | 13.37   | 481   | 13.8    | 68   | 36   |
| 88  | Monona          | 43.06  | -89.36  |       | 13.24   | 22.5 | 8.2  |
| 90  | Müggelsee       | 52.44  | 13.66   | 34    | 7.43    | 7.7  | 4.9  |
| 91  | Myastro         | 54.87  | 26.88   | 162   | 13.1    | 11.3 | 5.4  |
| 92  | Naroch          | 54.89  | 26.72   | 161   | 79.6    | 24.8 | 8.9  |
| 93  | Näsijärvi       | 61.83  | 23.82   | 95.4  | 256.48  | 65.6 | 13.6 |
| 94  | Nerka           | 59.57  | -159.01 | 21    | 201     | 164  | 39   |
| 96  | Nkuruba         | 0.52   | 30.30   | 1518  | 0.03    | 38   | 16   |
| 97  | North Pine      | -27.26 | 152.94  | 32    | 20.75   |      | 10.1 |
| 98  | Okareka         | -38.17 | 176.37  | 355   | 3.4     | 34   | 20   |
| 99  | Okaro           | -38.30 | 176.40  | 419.7 | 0.3     | 18   | 6    |
| 100 | Okataina        | -38.13 | 176.41  | 302   | 10.73   | 78.5 | 26.2 |
| 101 | Okeechobee      | 26.97  | -80.83  | 4.6   | 1780    | 5.5  | 2.7  |
| 102 | Opeongo         | 45.71  | -78.37  | 404   | 58.08   | 49.4 | 14.6 |
| 103 | Övre Skärjön    | 59.78  | 17.83   | 218.7 | 1.73    | 32   | 5.7  |
| 104 | Øyeren          | 59.85  | 11.18   | 101   | 85      | 76   |      |
| 105 | Päijänne        | 61.61  | 25.48   | 78.3  | 1082.01 | 94   | 14.2 |
| 106 | Päijänne        | 61.61  | 25.48   | 78.3  | 1082.01 | 94   | 14.2 |
| 107 | Pesiöjärvi      | 64.95  | 28.65   | 213.9 | 12.73   | 15.8 | 3.9  |
| 108 | Piburgersee     | 47.20  | 10.89   | 913   | 0.13    | 24.6 | 14   |
| 109 | Pielinen        | 63.27  | 29.61   | 93.7  | 895.47  | 61   | 10.1 |
| 111 | Plastic         | 45.18  | -78.82  | 253.9 | 0.3214  | 16.3 | 7.9  |
| 112 | Plussee         | 54.15  | 14.38   | 24    | 0.14    | 29   | 9.4  |
| 113 | Pyhäjärvi       | 61.00  | 22.29   | 44.9  | 155.33  | 26   | 5.5  |
| 114 | Pyhäselkä       | 62.53  | 29.75   | 75.9  | 361.1   | 67   | 8.76 |
| 115 | Red Chalk Main  | 45.19  | -78.95  | 343   | 0.4408  | 38   | 16.7 |
| 116 | Remmarsjön      | 63.81  | 20.54   | 234.1 | 1.36    | 14.4 | 5.2  |
| 117 | Rerewhakaaitu   | -38.29 | 176.50  | 438   | 5.17    | 15.8 | 5.3  |
| 118 | Rotehogstjärnen | 58.83  | 13.27   | 120.5 | 0.17    | 9.4  | 3.4  |
| 120 | Rotoiti         | -38.04 | 176.44  | 279   | 34.3    | 126  | 42   |
| 121 | Rotoma          | -38.06 | 176.59  | 316   | 11.6    | 83   | 27.7 |
| 122 | Rotorua         | -38.07 | 176.26  | 280   | 80.48   | 44.8 | 10.8 |
| 123 | Sans Chambre    | 46.72  | -81.13  | 379   | 0.15    | 15   | 5.6  |
| 124 | Selbusjøen      | 63.24  | 10.99   | 157   | 58      | 206  |      |
| 125 | Shira           | 54.51  | 90.19   | 356   | 35.9    | 24   | 11   |
| 129 | Sparkling Lake  | 46.01  | -89.70  | 495   | 0.64    | 20   | 10.9 |
| 130 | Spavinaw        | 36.39  | -95.05  | 201   | 6.39    | 14   |      |
| 131 | St Skärsjön     | 56.66  | 14.75   | 60    | 0.31    | 11.5 | 3.8  |

|     |                        |        |         |     |        |      |       |
|-----|------------------------|--------|---------|-----|--------|------|-------|
| 132 | Stensjön               | 61.58  | 18.93   | 268 | 0.57   | 8.5  | 4.2   |
| 133 | Stora Envättern        | 59.07  | 19.89   | 62  | 0.37   | 11.2 | 5     |
| 134 | Strynevatnet           | 61.93  | 7.04    | 29  | 23     | 230  |       |
| 135 | Sunapee                | 43.39  | -72.06  | 333 | 16.6   | 33.7 | 10    |
| 136 | Tanganyika             | -4.85  | 29.59   | 773 | 32600  | 1471 | 580   |
| 137 | Tarawera               | -38.20 | 176.45  | 298 | 41     | 87   | 56.37 |
| 138 | Taupo                  | -38.81 | 175.91  | 356 | 616    | 160  | 91.55 |
| 139 | Texoma                 | 33.83  | -96.57  | 188 | 356.12 | 31   | 11    |
| 140 | Thunderbird            | 35.22  | -97.22  | 317 | 21.76  | 17.7 | 4.7   |
| 141 | Tikitapu               | -38.12 | 176.33  | 418 | 1.44   | 27.5 | 18    |
| 142 | Toolik                 | 68.38  | -149.38 | 719 | 1.5    | 25   | 1.7   |
| 143 | Traunsee               | 47.85  | 13.80   | 422 | 24.4   | 191  | 89.7  |
| 145 | Trout Lake             | 46.03  | -89.67  | 492 | 16.08  | 35.7 | 14.6  |
| 146 | Vänern                 | 58.90  | 13.40   | 44  | 5648   | 72   | 27    |
| 148 | Wallenpaupack          | 41.41  | -75.24  | 361 | 23.07  | 15.8 | 8.99  |
| 149 | Washington             | 47.63  | -122.27 | 4.9 | 87.6   | 65.2 | 32.9  |
| 150 | Whitepine              | 47.28  | -80.83  | 393 | 0.67   | 22   | 5.6   |
| 151 | Windermere North Basin | 54.24  | -2.58   | 39  | 8.1    | 64   | 25.1  |
| 152 | Wingra                 | 43.05  | -89.43  |     | 1.4    | 6.7  | 2.7   |
| 153 | Vulture Lake           | 64.76  | -110.53 | 416 | 1.8    | 42   |       |
